# Supplementary material for: Redox-proteomic analysis of doxorubicin-induced altered thiol activity in cardiomyocytes
Source: Royal Society of Chemistry journal article supplement (doi:10.1039/c2mb25367d), 2012-12-21
Supplement: c2mb25367d.pdf [file c2mb25367d.pdf]

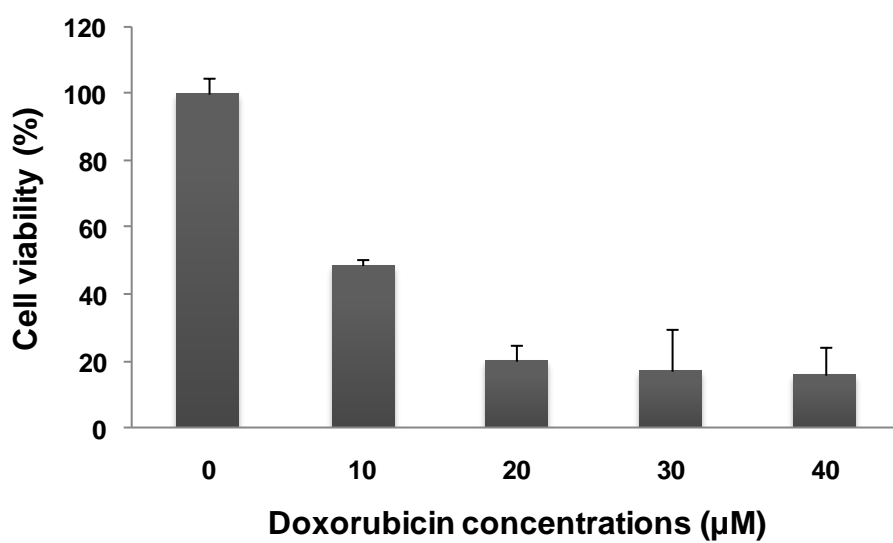

| Oxidation                                                                          |                                                                                                                                       | Reduction                                                                           |                                                                                                                                             |
|------------------------------------------------------------------------------------|---------------------------------------------------------------------------------------------------------------------------------------|-------------------------------------------------------------------------------------|---------------------------------------------------------------------------------------------------------------------------------------------|
| Redox change                                                                       | Proteins                                                                                                                              | Redox change                                                                        | Proteins                                                                                                                                    |
|    | 78 kDa glucose-regulated protein<br>Vimentin<br>Proteasome subunit alpha type-1<br>Cofilin-1<br>Aspartyl-tRNA synthetase, cytoplasmic |    | Heterogeneous nuclear ribonucleoprotein H<br>Dynactin subunit 2<br>Phosphoglycerate kinase 1<br>Septin-7<br>Nucleoside diphosphate kinase A |
|  | Heat shock cognate 71 kDa protein<br>Tubulin beta-2C chain                                                                            |  | Peptidyl-prolyl cis-trans isomerase A                                                                                                       |
|  | Peptidyl-prolyl cis-trans isomerase A                                                                                                 |  | 78 kDa glucose-regulated protein                                                                                                            |
|  | Calumenin<br>Tubulin beta-5 chain<br>RIMS-binding protein 2                                                                           |  | Serpin H1<br>Heterogeneous nuclear ribonucleoprotein A3<br>Heat shock protein beta-1<br>Stathmin<br>Nucleoside diphosphate kinase B         |
